# Supplementary material for: Asthma exacerbation prevalence during the COVID-19 lockdown in a moderate-severe asthma cohort
Source: HighWire-hosted journal article supplement (doi:10.1136/bmjresp-2020-000758), 2021-05-01
Supplement: bmjresp-2020-000758supp001_data_supplement.pdf [file bmjresp-2020-000758supp001_data_supplement.pdf]

**Online supplementary material:** Asthma exacerbation prevalence during the Covid-19/COVID-19 lockdown in a moderate-severe asthma cohort**G.M. de Boer et al.****Questionnaire**

Date:

Study number:

Are you diagnosed with asthma by a doctor?

Yes / No

Have you been vaccinated for seasonal flu for the season 2019/2020?

Yes / No

What is your household size? \_\_\_\_\_

What medications do you take?  
\_\_\_\_\_  
\_\_\_\_\_  
\_\_\_\_\_

How often did you experience a respiratory tract infection in 2020? \_\_\_\_\_ times

How often did you experience a period of fever from March 2020 onwards?

\_\_\_\_\_ times

If present, was this fever present during a respiratory tract infection?

Yes / No

How many days have you been stayed at home because of a respiratory tract infection or fever?

Respiratory tract infection: \_\_\_\_\_ days from March 2020 onwards

Fever: \_\_\_\_\_ days from March 2020 onwards

How many asthma exacerbations did you experience for which antibiotics and/or prednisone were prescribed?

- Between April 2019 and October 2019: \_\_\_\_\_
- Between October 2019 and March 2020: \_\_\_\_\_
- From March 2020 onwards: \_\_\_\_\_

Did you experience COVID-19 disease?

Yes / No / Unsure

Did anyone in your household or close family experience COVID-19? Yes / No / Unsure

On a 1-10 scale: are you worried to acquire COVID-19? (1=not at all – 10=very much)

1    2    3    4    5    6    7    8    9    10

On a 1-10 scale: are you worried to acquire an asthma exacerbation? (1=not at all – 10=very much)

1    2    3    4    5    6    7    8    9    10

Did you avoid your general practitioner, the hospital emergency department or other essential medical care due to Covid-19?

Yes / No

Did you delay essential medical care due to Covid-19?

Yes / No

Are you afraid of acquiring COVID-19 when you visit your general practitioner or the hospital?

Yes / No
